# Supplementary material
Source: PubMed Central journal article supplement (PMC4697276)
Supplement: NIHMS706224-supplement-Supplementary_Material.pdf [file NIHMS706224-supplement-Supplementary_Material.pdf]

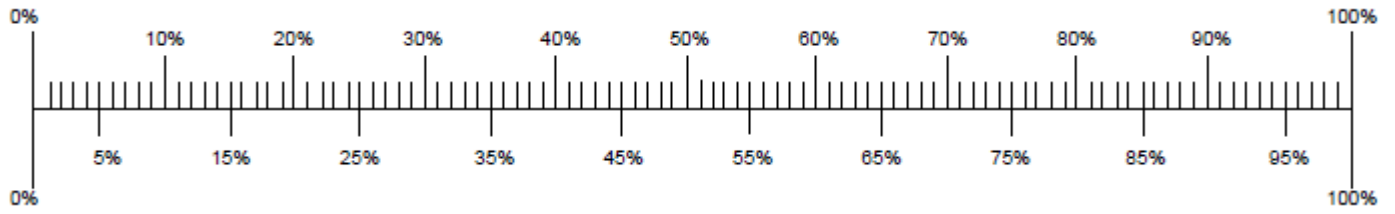

No chance

Certainty

*What is the probability that you will keep your permanent address in the same state during the next year?*

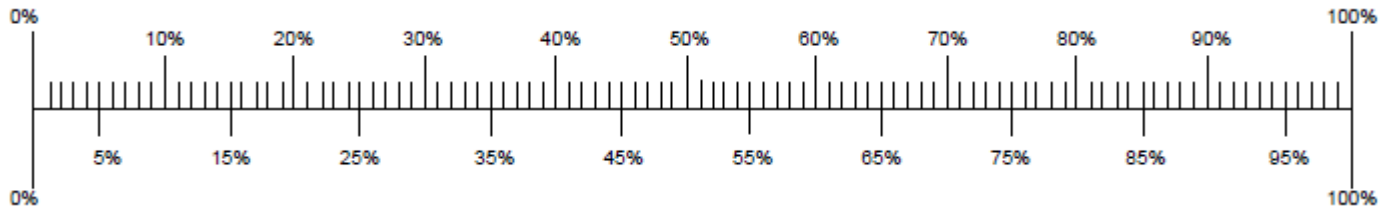

No chance

Certainty

**Supplementary eTable 1a. Correlation between *Resistance to Sunk Cost and Resistance to Framing* and other measures in the Depressed Participants**

|                                           |           | ADMC      |                       | Demographic | Cognition                    | IQ     | Interpersonal   |                 |                |                                     |
|-------------------------------------------|-----------|-----------|-----------------------|-------------|------------------------------|--------|-----------------|-----------------|----------------|-------------------------------------|
|                                           |           | Sunk Cost | Resistance to Framing | Age         | Mattis Dementia Rating Scale | WTAR   | IIP Sensitivity | IIP Ambivalence | IIP Aggression | SPSI Impulsivity Carelessness Style |
| <b>ADMC</b>                               |           |           |                       |             |                              |        |                 |                 |                |                                     |
| Resistance to Framing                     | Pearson R | .01       |                       |             |                              |        |                 |                 |                |                                     |
| <b>Demographic</b>                        |           |           |                       |             |                              |        |                 |                 |                |                                     |
| Age                                       | Pearson R | -.13      | -.13                  |             |                              |        |                 |                 |                |                                     |
| <b>Cognition</b>                          |           |           |                       |             |                              |        |                 |                 |                |                                     |
| Mattis Dementia Rating Scale              | Pearson R | .23**     | .16                   | -.34**      |                              |        |                 |                 |                |                                     |
| <b>IQ</b>                                 |           |           |                       |             |                              |        |                 |                 |                |                                     |
| WTAR                                      | Pearson R | .23**     | .36**                 | -.031       | .39**                        |        |                 |                 |                |                                     |
| <b>Interpersonal</b>                      |           |           |                       |             |                              |        |                 |                 |                |                                     |
| IIP Sensitivity                           | Pearson R | -.01      | -.05                  | -.34**      | .06                          | .04    |                 |                 |                |                                     |
| IIP Ambivalence                           | Pearson R | -.134     | -.17*                 | -.14        | -.15                         | -.28** | .38**           |                 |                |                                     |
| IIP Aggression                            | Pearson R | .05       | -.02                  | -.20*       | .03                          | -.01   | .71**           | .49**           |                |                                     |
| <b>Impulsivity/Social Problem Solving</b> |           |           |                       |             |                              |        |                 |                 |                |                                     |
| SPSI Impulsivity Carelessness Style       | Pearson R | -.10      | -.17*                 | -.17        | -0.08                        | -.17   | .30**           | .54**           | .37**          |                                     |
| <b>Depression</b>                         |           |           |                       |             |                              |        |                 |                 |                |                                     |
| Hamilton 16***                            | Pearson R | -.02      | -.01                  | -.29**      | -.02                         | -.06   | .24**           | .22*            | .15**          | .30**                               |

Sample size for assessments (mean) = 142, range 140 -148

\* Correlation is significant at the 0.05 level (2-tailed).

\*\* Correlation is significant at the 0.01 level (2-tailed).

\*\*\* No suicide Items used

Susceptibility to sunk cost bias was moderately correlated with poor global cognition (DRS scores) and modestly correlated with struggle in interpersonal relationships (IIP Ambivalence Subscale). Inability to resist framing effects was modestly correlated with age, global cognition, IQ (WTAR score), struggle in interpersonal relationships, and impulsive/careless social problem (SPSI Impulsivity/Carelessness Style).

**Supplementary eTable 1b. Correlation between *Over/Underconfidence* and *Consistency in Risk Perception* and other measures in the Depressed Participants**

|                                           |           | ADMC                  |                                | Demographic | Cognition                    | Interpersonal   |                 |                | SPSI Impulsivity Carelessness Style |              |
|-------------------------------------------|-----------|-----------------------|--------------------------------|-------------|------------------------------|-----------------|-----------------|----------------|-------------------------------------|--------------|
|                                           |           | Over/Under Confidence | Consistency in Risk Perception | Age         | Mattis Dementia Rating Scale | IIP Sensitivity | IIP Ambivalence | IIP Aggression |                                     |              |
| <b>ADMC</b>                               |           |                       |                                |             |                              |                 |                 |                |                                     |              |
| Consistency in Risk Perception            | Pearson R | -.14                  |                                |             |                              |                 |                 |                |                                     |              |
| <b>Demographic</b>                        |           |                       |                                |             |                              |                 |                 |                |                                     |              |
| Age                                       | Pearson R | .03                   | -.06                           |             |                              |                 |                 |                |                                     |              |
| <b>Cognition</b>                          |           |                       |                                |             |                              |                 |                 |                |                                     |              |
| Mattis Dementia Rating Scale              | Pearson R | <b>.22**</b>          | .01                            | -.34**      |                              |                 |                 |                |                                     |              |
| <b>Interpersonal</b>                      |           |                       |                                |             |                              |                 |                 |                |                                     |              |
| IIP Sensitivity                           | Pearson R | -.10                  | -.02                           | -.34**      |                              | .06             |                 |                |                                     |              |
| IIP Ambivalence                           | Pearson R | <b>-.22**</b>         | -.12                           | -.14        | -.15                         | <b>.38**</b>    |                 |                |                                     |              |
| IIP Aggression                            | Pearson R | -.10                  | -.14                           | -.20*       | .03                          | <b>.71**</b>    | <b>.49**</b>    |                |                                     |              |
| <b>Impulsivity/Social Problem Solving</b> |           |                       |                                |             |                              |                 |                 |                |                                     |              |
| SPSI Impulsivity Carelessness Style       | Pearson R | <b>-.17*</b>          | -.10                           | -.17        | -0.75                        | <b>.30**</b>    | <b>.54**</b>    | <b>.37**</b>   |                                     |              |
| <b>Depression</b>                         |           |                       |                                |             |                              |                 |                 |                |                                     |              |
| Hamilton 16***                            | Pearson R | .02                   | .09                            | -.29**      |                              | -.02            | <b>.24**</b>    | <b>.22*</b>    | <b>.15**</b>                        | <b>.30**</b> |

Sample size for assessments (mean) = 142, range 140-148

\* Correlation is significant at the 0.05 level (2-tailed).

\*\* Correlation is significant at the 0.01 level (2-tailed).

Over/under Confidence was moderately correlated with poor global cognition (DRS scores) and with struggle in interpersonal relationships (IIP Ambivalence Subscale) and modestly correlated with impulsivity (SPSI Impulsivity/Carelessness Style). Consistency in Risk Perception modestly correlated with interpersonal aggression (IIP Aggression Subscale).

### **Sensitivity analyses**

To ensure that group differences were not distorted by partial effects of age<sup>1</sup>, we equated all 5 groups on age by excluding the oldest participants from the non-psychiatric control (8 dropped) and the depressed non-suicidal groups (11 dropped). In this sample of 152 participants, group differences in resistance to sunk cost ( $F[4,142]=3.61, p=0.008, \eta_p^2=0.09$ ) and resistance to framing ( $F[4,142]=4.27, p=0.003, \eta_p^2=0.11$ ) remained after controlling for gender, race, age, and Dementia Rating Scale score.

## References

1. Miller GA, Chapman JP. Misunderstanding analysis of covariance. *Journal of abnormal psychology* 2001 Feb;110(1):40-48.
